# Supplementary material for: An allosteric pan-TEAD inhibitor blocks oncogenic YAP/TAZ signaling and overcomes KRAS G12C inhibitor resistance
Source: Springer Nature journal article supplement (doi:10.1038/s43018-023-00577-0), 2023-06-05
Supplement: MOESM1 [file 43018_2023_577_MOESM1_ESM.pdf]

# **An allosteric pan-TEAD inhibitor blocks oncogenic YAP/TAZ signaling and overcomes KRAS G12C inhibitor resistance**

---

In the format provided by the  
authors and unedited

**Supplementary Table S1.** Small molecule screening data

| Category          | Parameter                                | Description                                                                                                                                                        |
|-------------------|------------------------------------------|--------------------------------------------------------------------------------------------------------------------------------------------------------------------|
| Assay             | Type of assay:                           | In vitro biochemical binding assay using recombinant proteins                                                                                                      |
|                   | Target:                                  | YAP <sub>50-100</sub> (P46937) - TEAD3 (Q99594) PPI.                                                                                                               |
|                   | Primary measurement:                     | Detection of TR-FRET signal from the disruption of the YAP-TEAD complex                                                                                            |
|                   | Key reagents                             | His6-TEAD3 (217-447), Genentech<br>Biotin-YAP (50-100), Genentech<br>Streptavidin-XL665 (CIS Bio)<br>Anti-His-europium (PerkinElmer)                               |
|                   | Assay protocol                           | See Methods "TEAD YAP/TAZ TR-FRET Assay"                                                                                                                           |
|                   | Additional comments                      | None                                                                                                                                                               |
| Library           | Library size                             | 2.2 million compounds                                                                                                                                              |
|                   | Library composition                      | Roche and Genentech internal compound collection. Compounds include internally made molecules for all internal programs and externally sourced compounds.          |
|                   | Source                                   | Internal and External                                                                                                                                              |
|                   | Additional comments                      | None                                                                                                                                                               |
| Screen            | Format                                   | Competitive binding assay with a proximity-based readout of time-resolved fluorescence resonance energy transfer                                                   |
|                   | Concentration(s) tested                  | 5 uM (2,130,060 compounds), 20 uM (334 compounds), 25 uM (59,156 compounds), 100 uM (5991 compounds). DMSO: 0.5%.                                                  |
|                   | Plate controls                           | Neutral control: all reaction components with DMSO as sample<br>Blank: all reaction components except TEAD3 with DMSO as sample<br>Reference inhibitor: peptide 17 |
|                   | Reagent/ compound dispensing system      | Reagent: BioRapTR (Beckman); Compound: Echo 555 acoustic dispenser (Beckman)                                                                                       |
|                   | Detection instrument and software        | ViewLux (PerkinElmer). Analysis software: Genedata Screener                                                                                                        |
|                   | Assay validation/QC                      | RZ' range: 0.44-0.94, RZ' average = 0.68.<br>Signal/Background range: 4.0-11.2;<br>Signal/Background average = 6.8                                                 |
|                   | Correction factors                       | None                                                                                                                                                               |
|                   | Normalization                            | Neutral control – Blank. Analyzed using Genedata Screener software                                                                                                 |
|                   | Additional comments                      |                                                                                                                                                                    |
|                   |                                          |                                                                                                                                                                    |
| Post-HTS analysis | Hit criteria                             | Inhibition >= 20%                                                                                                                                                  |
|                   | Hit rate                                 | 0.085% (1870 of 2,200,000)                                                                                                                                         |
|                   | Additional assay(s)                      | Confirmation in dose-response in YAP/TEAD3 PPI TR-FRET assay; counterscreen in dose-response in TR-FRET assay with 6x-His-Biotin in place of YAP/TEAD3 complex     |
|                   | Confirmation of hit purity and structure | All hits where resynthesized and compounds tested for purity via NMR and LC-MS.                                                                                    |
|                   | Additional comments                      | Please see chart for HTS workflow.                                                                                                                                 |

**Supplementary Table S2. X-ray crystallography data collection and refinement statistics**

|                                                     | TEAD2/Compound 1<br>PDB: 7TYQ                                      | TEAD2/Compound 2<br>PDB: 7TYU                                     | TEAD2/GNE-7883<br>PDB: 7TYP                                       |
|-----------------------------------------------------|--------------------------------------------------------------------|-------------------------------------------------------------------|-------------------------------------------------------------------|
| <b>Data collection</b>                              |                                                                    |                                                                   |                                                                   |
| Space group                                         | C121                                                               | C121                                                              | C121                                                              |
| Cell dimensions                                     |                                                                    |                                                                   |                                                                   |
| <i>a</i> , <i>b</i> , <i>c</i> (Å)                  | 114.85, 61.18, 79.95                                               | 115.27, 61.53, 79.41                                              | 122.97, 61.43, 80.05                                              |
| $\alpha$ , $\beta$ , $\gamma$ (°)                   | 90, 111.61, 90                                                     | 90, 111.759, 90                                                   | 90, 117.18, 90                                                    |
| Wavelength (Å)                                      | 1.00000                                                            | 0.97946                                                           | 0.99999                                                           |
| Resolution (Å)                                      | 53.74-1.88 (ellipsoidal)<br>53.74-2.30 (isotropic)<br>(1.91-1.88)* | 53.84-1.78 (ellipsoidal)<br>53.84-2.16 (isotropic)<br>(1.82-1.78) | 71.21-1.60 (ellipsoidal)<br>71.21-1.90 (isotropic)<br>(1.76-1.60) |
| <i>R</i> <sub>merge</sub>                           | 0.059 (0.991)                                                      | 0.025 (0.576)                                                     | 0.032 (0.741)                                                     |
| <i>I</i> / $\sigma(I)$                              | 16.2 (1.7)                                                         | 14.0 (1.5)                                                        | 17.2 (1.5)                                                        |
| CC(1/2)                                             | 0.999 (0.711)                                                      | 1.00 (0.783)                                                      | 0.999 (0.652)                                                     |
| Completeness                                        | 94.4 (73.1)                                                        | 92.2 (61.3)                                                       | 89.2 (68.4)                                                       |
| Redundancy                                          | 6.8 (7.2)                                                          | 3.4 (3.6)                                                         | 3.3 (3.5)                                                         |
| <b>Refinement</b>                                   |                                                                    |                                                                   |                                                                   |
| Resolution (Å)                                      | 74.33-1.88 (anisotropic)                                           | 53.84-1.78 (anisotropic)                                          | 71.21-1.60 (anisotropic)                                          |
| No. reflections                                     | 28082 (1405)                                                       | 31238 (1563)                                                      | 42783 (2140)                                                      |
| <i>R</i> <sub>work</sub> / <i>R</i> <sub>free</sub> | 0.2061/0.2472                                                      | 0.1972/0.2298                                                     | 0.1840/0.2156                                                     |
| No. atoms                                           |                                                                    |                                                                   |                                                                   |
| Protein                                             | 3251                                                               | 3268                                                              | 3361                                                              |
| Ligand/ion                                          | 50                                                                 | 70                                                                | 90                                                                |
| Water                                               | 66                                                                 | 81                                                                | 190                                                               |
| <i>B</i> -factors                                   |                                                                    |                                                                   |                                                                   |
| Protein                                             | 49.2                                                               | 51.9                                                              | 37.5                                                              |
| Ligand/ion                                          | 41.3                                                               | 45.2                                                              | 26.7                                                              |
| Water                                               | 45.1                                                               | 48.1                                                              | 44.0                                                              |
| R.m.s. deviations                                   |                                                                    |                                                                   |                                                                   |
| Bond lengths (Å)                                    | 0.004                                                              | 0.004                                                             | 0.01                                                              |
| Bond angles (°)                                     | 0.67                                                               | 0.71                                                              | 1.38                                                              |

\*Values in parentheses are for highest-resolution shell.
